# Supplementary material for: Characterization of Cabernet Sauvignon Wines by Untargeted HS-SPME GC-QTOF-MS
Source: MDPI journal article supplement (doi:10.3390/molecules27051726), 2022-03-07
Supplement: s1 [file s1]

# Characterization of Cabernet Sauvignon wines by untargeted HS-SPME GC-QTOF/MS

Alejandra Chávez-Márquez<sup>1</sup>, Alfonso A. Gardea<sup>1</sup>, Humberto González-Ríos<sup>1</sup> and Luz Vazquez-Moreno<sup>1,\*</sup>

<sup>1</sup> Centro de Investigación en Alimentación y Desarrollo A.C. Carretera Gustavo Enrique Astiazarán Rosas, No. 46, Col. La Victoria, CP. 83304, Hermosillo, Sonora, México; alejandra.chavez@estudiantes.ciad.mx (ACM); gardea@ciad.mx (AAG); hgory@ciad.mx (HGR)

\* Correspondence: lvazquez@ciad.mx

**Supplementary Table S1.** Repeatability, Reproducibility, Linearity ( $r$ ), Limit of detection (LOD) and limit of quantification (LOQ) determinations.

**Supplementary Table S2.** Identified compounds in pool QC.

**Supplementary Table S3.** Mass to charge ratio of unknown components.

**Supplementary Table S4.** Batch sequence.

**Supplementary Table S1.** Repeatability, Reproducibility, Linearity (*r*), Limit of detection (LOD) and limit of quantification (LOQ) determinations.

| Standards                           | Level 1                                       | Level 2                                       | Level 3                                       | Level 4                                       | Level 5                                        | PW | LOD  | LOQ  | <i>r</i>                                |
|-------------------------------------|-----------------------------------------------|-----------------------------------------------|-----------------------------------------------|-----------------------------------------------|------------------------------------------------|----|------|------|-----------------------------------------|
| $\alpha$ -Pinene (ng/L)             | 1.5                                           | 3.0                                           | 6.2                                           | 12.5                                          | 25.0                                           | ND | 0.16 | 0.55 | 0.9998                                  |
| Area (mean $\pm$ SD) <sup>1</sup>   | 1.7x10 <sup>7</sup> $\pm$ 7.3x10 <sup>6</sup> | 3.3x10 <sup>7</sup> $\pm$ 1.7x10 <sup>6</sup> | 7.3x10 <sup>7</sup> $\pm$ 3.4x10 <sup>6</sup> | 1.4x10 <sup>8</sup> $\pm$ 9x10 <sup>6</sup>   | 2.8x10 <sup>8</sup> $\pm$ 1.93x10 <sup>7</sup> |    |      |      | y=1x10 <sup>7</sup> x-3x10 <sup>6</sup> |
| Repeatability (%RSD) <sup>1</sup>   | 4                                             | 5                                             | 5                                             | 7                                             | 1                                              |    |      |      |                                         |
| Reproducibility (%RSD) <sup>2</sup> | 13                                            | -                                             | 5                                             | -                                             | 7                                              |    |      |      |                                         |
| RT (10.66 $\pm$ 0.01) <sup>3</sup>  |                                               |                                               |                                               |                                               |                                                |    |      |      |                                         |
| $\beta$ -Pinene (ng/L)              | 1.5                                           | 3.0                                           | 6.2                                           | 12.5                                          | 25.0                                           | ND | 1.70 | 2.35 | 0.9992                                  |
| Area (mean $\pm$ SD) <sup>1</sup>   | 1.2x10 <sup>7</sup> $\pm$ 2x10 <sup>6</sup>   | 2.5x10 <sup>7</sup> $\pm$ 4.5x10 <sup>6</sup> | 5.3x10 <sup>7</sup> $\pm$ 5.4x10 <sup>6</sup> | 1x10 <sup>8</sup> $\pm$ 1.2x10 <sup>7</sup>   | 2.1x10 <sup>8</sup> $\pm$ 9.4x10 <sup>6</sup>  |    |      |      | y=1x10 <sup>7</sup> x-3x10 <sup>6</sup> |
| Repeatability (%RSD) <sup>1</sup>   | 16                                            | 18                                            | 10                                            | 11                                            | 4                                              |    |      |      |                                         |
| Reproducibility (%RSD) <sup>2</sup> | 15                                            | -                                             | 12                                            | -                                             | 18                                             |    |      |      |                                         |
| RT (13.91 $\pm$ 0.01) <sup>3</sup>  |                                               |                                               |                                               |                                               |                                                |    |      |      |                                         |
| <i>p</i> -Cymene (ng/L)             | 0.3                                           | 0.6                                           | 1.5                                           | 2.5                                           | 5.0                                            | ND | 0.10 | 0.33 | 0.9965                                  |
| Area (mean $\pm$ SD) <sup>1</sup>   | 1.2x10 <sup>7</sup> $\pm$ 2x10 <sup>6</sup>   | 2.3x10 <sup>7</sup> $\pm$ 2.3x10 <sup>6</sup> | 4.6x10 <sup>7</sup> $\pm$ 3.9x10 <sup>6</sup> | 1x10 <sup>8</sup> $\pm$ 1.9x10 <sup>7</sup>   | 1.8x10 <sup>8</sup> $\pm$ 1.4x10 <sup>7</sup>  |    |      |      | y=3x10 <sup>7</sup> x+4x10 <sup>6</sup> |
| Repeatability (%RSD) <sup>1</sup>   | 13                                            | 10                                            | 8                                             | 19                                            | 7                                              |    |      |      |                                         |
| Reproducibility (%RSD) <sup>2</sup> | 11                                            | -                                             | 8                                             | -                                             | 12                                             |    |      |      |                                         |
| RT (21.22 $\pm$ 0.09) <sup>3</sup>  |                                               |                                               |                                               |                                               |                                                |    |      |      |                                         |
| 2-Undecanone (ng/L)                 | 0.3                                           | 0.6                                           | 1.5                                           | 2.5                                           | 5.0                                            | ND | 0.04 | 0.15 | 0.9998                                  |
| Area (mean $\pm$ SD) <sup>1</sup>   | 3.8x10 <sup>7</sup> $\pm$ 7.2x10 <sup>6</sup> | 6.7x10 <sup>7</sup> $\pm$ 6.2x10 <sup>6</sup> | 1.3x10 <sup>7</sup> $\pm$ 1.3x10 <sup>6</sup> | 2.9x10 <sup>8</sup> $\pm$ 3.5x10 <sup>7</sup> | 6x10 <sup>8</sup> $\pm$ 5.2x10 <sup>7</sup>    |    |      |      | y=1x10 <sup>7</sup> x-1x10 <sup>5</sup> |
| Repeatability (%RSD) <sup>1</sup>   | 10                                            | 9                                             | 9                                             | 12                                            | 8                                              |    |      |      |                                         |
| Reproducibility (%RSD) <sup>2</sup> | 15                                            | -                                             | 9                                             | -                                             | 10                                             |    |      |      |                                         |
| RT (36.19 $\pm$ 0.02) <sup>3</sup>  |                                               |                                               |                                               |                                               |                                                |    |      |      |                                         |

LOD and LOQ n=10; <sup>1</sup>n=3; <sup>2</sup>n=6; <sup>3</sup>RT=Retention time in minutes, n=24. PW= pooled wines as blank sample.

**Supplementary Table S2.** Identified compounds in pool QC.

| Component RT | Component RI | Delta RI | CAS#         | Compound Name                  | Match Factor | Component Area | Mean          | SD          | %RSD <sup>1</sup> | Rel. Ab. <sup>2</sup> | Library <sup>3</sup> |
|--------------|--------------|----------|--------------|--------------------------------|--------------|----------------|---------------|-------------|-------------------|-----------------------|----------------------|
| 6.74         | 899.72       | 1.14     | 141-78-6     | Ethyl Acetate                  | 71.79        | 1087566213.59  | 1100750853.81 | 66285968.86 | 6.02              | 100.0000              | 1                    |
| 7.20         | 915.50       | 2.19     | 67-56-1      | Methyl Alcohol                 | 98.10        | 13587391.37    | 15013483.34   | 469947.94   | 3.13              | 1.3639                | 1                    |
| 9.07         | 979.62       | ND       | 97-62-1      | Ethyl isobutyrate              | 85.96        | 15584492.68    | 17165442.35   | 1257693.09  | 7.33              | 1.5594                | 2                    |
| 11.52        | 1050.51      | 0.39     | 105-54-4     | Ethyl butyrate                 | 99.63        | 44572541.31    | 47038254.97   | 1107987.17  | 2.36              | 4.2733                | 1                    |
| 11.99        | 1062.40      | 1.18     | 71-23-8      | 1-Propanol                     | 89.58        | 16519309.31    | 20014759.34   | 1616279.19  | 8.08              | 1.8183                | 1                    |
| 12.19        | 1067.23      | 0.28     | 7452-79-1    | Ethyl $\alpha$ -methylbutyrate | 98.12        | 12364596.67    | 14518819.58   | 334954.94   | 2.31              | 1.3190                | 1                    |
| 12.84        | 1083.51      | 0.85     | 108-64-5     | Ethyl isovalerate              | 99.59        | 25416351.31    | 26706195.80   | 315372.66   | 1.18              | 2.4262                | 1                    |
| 13.21        | 1092.92      | 0.39     | -            | Unknown 13.2265                | 77.91        | 606649.29      | 944230.04     | 102967.10   | 10.90             | 0.0858                | 1                    |
| 14.61        | 1126.43      | 0.57     | 78-83-1      | Isobutyl alcohol               | 99.76        | 87994861.16    | 104833869.14  | 1698484.22  | 1.62              | 9.5239                | 1                    |
| 15.00        | 1134.94      | 0.26     | 123-92-2     | Isoamyl acetate                | 99.18        | 204784005.40   | 217565827.57  | 4227683.76  | 1.94              | 19.7652               | 1                    |
| 20.91        | 1263.61      | -2.91    | 100-42-5     | Styrene                        | 94.75        | 2185898.78     | 2637408.69    | 230436.37   | 8.74              | 0.2396                | 1                    |
| 21.36        | 1273.26      | -0.03    | 106-27-4     | Isoamyl butyrate               | 84.82        | 4501969.30     | 4311124.89    | 401591.32   | 9.32              | 0.3917                | 1                    |
| 21.88        | 1284.42      | ND       | 142-92-7     | Hexyl acetate                  | 74.51        | 4215107.49     | 6644252.36    | 696714.22   | 10.49             | 0.6036                | 2                    |
| 22.70        | 1302.11      | -0.71    | 1000450-02-5 | Furfuryl ethyl ether           | 90.48        | 1454541.77     | 1780045.02    | 80808.85    | 4.54              | 0.1617                | 1                    |
| 23.24        | 1313.96      | ND       | 513-86-0     | Acetoin                        | 87.05        | 5123806.82     | 6406296.59    | 343083.10   | 5.36              | 0.5820                | 3                    |
| 24.08        | 1332.80      | 0.52     | -            | Unknown 24.1025                | 75.06        | 805323.58      | 684910.56     | 103863.08   | 15.16             | 0.0622                | 1                    |
| 24.53        | 1342.98      | 0.23     | 626-89-1     | 4-Methyl-1-pentanol            | 78.16        | 4007739.36     | 4799090.32    | 254606.05   | 5.31              | 0.4360                | 1                    |
| 24.65        | 1345.78      | ND       | 106-30-9     | Ethyl heptanoate               | 84.34        | 8158810.48     | 10845075.98   | 1235292.79  | 11.39             | 0.9852                | 2                    |
| 25.05        | 1354.65      | 1.02     | 111-27-3     | 1-Hexanol                      | 99.28        | 11354719.15    | 12568021.68   | 182580.94   | 1.45              | 1.1418                | 1                    |
| 25.31        | 1360.62      | -1.62    | 1552-67-6    | Ethyl 2-hexanoate              | 91.96        | 5488715.71     | 6345702.45    | 313644.20   | 4.94              | 0.5765                | 1                    |
| 25.82        | 1372.03      | 0.25     | 97-64-3      | Ethyl lactate                  | 95.64        | 152996004.42   | 189613393.54  | 11923776.76 | 6.29              | 17.2258               | 1                    |
| 26.19        | 1380.53      | 0.64     | 629-33-4     | Hexyl formate                  | 99.88        | 148708934.43   | 166283152.83  | 3400573.41  | 2.05              | 15.1063               | 1                    |
| 26.60        | 1389.73      | 1.12     | 106-72-9     | 2,6-Dimethyl-5-heptenal        | 84.34        | 2739757.24     | 2199600.34    | 181051.22   | 8.23              | 0.1998                | 1                    |
| 27.11        | 1401.17      | 0.95     | 111-11-5     | Methyl octanoate               | 89.96        | 7524103.30     | 9065134.37    | 522206.22   | 5.76              | 0.8235                | 1                    |
| 27.50        | 1409.98      | 1.29     | 928-97-2     | trans-3-Hexen-1-ol             | 75.79        | 1547391.82     | 1526070.25    | 71385.97    | 4.68              | 0.1386                | 1                    |
| 27.90        | 1419.17      | -0.08    | 589-98-0     | 3-Octanol                      | 90.26        | 988144.89      | 1389772.62    | 70707.22    | 5.09              | 0.1263                | 1                    |

|       |         |       |            |                                   |       |              |              |             |       |         |   |
|-------|---------|-------|------------|-----------------------------------|-------|--------------|--------------|-------------|-------|---------|---|
| 28.47 | 1432.61 | 0.28  | 928-94-9   | cis-2-Hexen-1-ol                  | 88.09 | 1060782.93   | 1272632.77   | 46475.68    | 3.65  | 0.1156  | 1 |
| 30.29 | 1475.04 | 0.80  | 64-19-7    | Acetic acid                       | 99.08 | 207322164.46 | 276816056.07 | 31130368.46 | 11.25 | 25.1479 | 1 |
| 30.61 | 1482.42 | -0.10 | -          | Unknown 30.6066                   | 96.09 | 1978989.65   | 2989409.36   | 99746.27    | 3.34  | 0.2716  | 1 |
| 31.51 | 1503.48 | ND    | 35194-38-8 | Ethyl 7-octenoate                 | 86.86 | 945796.35    | 1161878.55   | 101158.12   | 8.71  | 0.1056  | 3 |
| 31.94 | 1513.49 | -0.40 | 104-76-7   | 2-Ethyl-1-hexanol                 | 95.93 | 5231903.24   | 6700126.80   | 496535.62   | 7.41  | 0.6087  | 1 |
| 32.84 | 1535.81 | -0.28 | 111-87-5   | 1-Octanol                         | 95.93 | 12316994.51  | 15903671.30  | 273784.79   | 1.72  | 1.4448  | 1 |
| 33.19 | 1544.36 | 0.59  | 628-99-9   | 2-Nonanol                         | 97.22 | 5467682.51   | 7104505.80   | 631315.64   | 8.89  | 0.6454  | 1 |
| 33.53 | 1552.89 | -0.92 | 123-29-5   | Ethyl nonanoate                   | 98.36 | 9350689.12   | 11068694.60  | 911506.44   | 8.23  | 1.0056  | 1 |
| 34.22 | 1569.84 | -0.67 | 10348-47-7 | Ethyl 2-hydroxy-4-mthylpentanoate | 77.43 | 6464520.07   | 9982126.20   | 390297.61   | 3.91  | 0.9068  | 1 |
| 34.24 | 1570.49 | -0.05 | 78-70-6    | β-Linalool                        | 98.07 | 3961162.19   | 5309272.77   | 510920.38   | 9.62  | 0.4823  | 1 |
| 34.40 | 1574.50 | 0.85  | 513-85-9   | 2,3-Butanediol                    | 96.32 | 77184019.72  | 93491060.57  | 6755710.08  | 7.23  | 8.4934  | 1 |
| 34.75 | 1582.98 | 0.31  | -          | Unknown 34.7591                   | 98.79 | 20412970.14  | 26028322.52  | 624778.38   | 2.40  | 2.3646  | 1 |
| 34.94 | 1587.79 | 0.43  | -          | Unknown 34.9582                   | 90.25 | 506305.29    | 729575.37    | 28302.78    | 3.88  | 0.0663  | 1 |
| 35.29 | 1596.47 | -0.11 | -          | Unknown 35.2873                   | 98.06 | 13207988.42  | 18319788.04  | 499196.19   | 2.72  | 1.6643  | 1 |
| 35.43 | 1599.92 | 0.63  | -          | Unknown 35.4563                   | 91.05 | 1047785.33   | 1919098.78   | 126593.28   | 6.60  | 0.1743  | 1 |
| 35.88 | 1610.99 | 0.38  | -          | Unknown 35.8931                   | 98.79 | 23698502.24  | 28229852.54  | 1932323.25  | 6.84  | 2.5646  | 1 |
| 36.48 | 1626.45 | ND    | 57-55-6    | Propylene Glycol                  | 91.25 | 4299517.72   | 5109297.02   | 341953.17   | 6.69  | 0.4642  | 3 |
| 37.70 | 1657.88 | -0.59 | 110-38-3   | Ethyl decanoate                   | 99.28 | 578242990.82 | 692663626.49 | 56769634.66 | 8.20  | 62.9265 | 1 |
| 38.54 | 1679.49 | -1.30 | 2035-99-6  | Isoamyl octanoate                 | 97.14 | 10410589.81  | 14809788.69  | 1204182.62  | 8.13  | 1.3454  | 1 |
| 38.80 | 1686.24 | -0.27 | 143-08-8   | 1-nonanol                         | 99.59 | 17179953.44  | 25494378.22  | 737472.70   | 2.89  | 2.3161  | 1 |
| 38.99 | 1691.08 | -0.18 | -          | Unknown 38.9824                   | 77.93 | 1255935.02   | 2080581.02   | 149834.50   | 7.20  | 0.1890  | 1 |
| 39.20 | 1696.44 | -0.03 | -          | Unknown 39.1966                   | 91.01 | 7157775.48   | 9966946.86   | 550827.24   | 5.53  | 0.9055  | 1 |
| 39.74 | 1710.52 | ND    | 67233-91-4 | Ethyl 9-decenoate                 | 94.64 | 15241111.88  | 18500131.85  | 1378250.24  | 7.45  | 1.6807  | 3 |
| 40.71 | 1736.45 | 1.64  | -          | Unknown 40.7705                   | 92.97 | 3527214.72   | 5733993.98   | 309131.38   | 5.39  | 0.5209  | 1 |
| 41.07 | 1746.06 | ND    | 505-10-2   | γ-Methylmercaptopropyl alcohol    | 91.49 | 3306390.14   | 3586758.48   | 363625.05   | 10.14 | 0.3258  | 3 |
| 41.30 | 1752.44 | 1.16  | -          | Unknown 41.3476                   | 94.41 | 1492670.86   | 2408209.86   | 151986.66   | 6.31  | 0.2188  | 1 |
| 41.47 | 1756.79 | 1.40  | -          | Unknown 41.5185                   | 97.62 | 1170441.35   | 1403476.86   | 69958.39    | 4.98  | 0.1275  | 1 |
| 42.60 | 1787.37 | -0.11 | 112-30-1   | Decyl alcohol                     | 87.32 | 7609909.11   | 10934867.02  | 604886.57   | 5.53  | 0.9934  | 1 |

|       |         |       |            |                           |       |              |              |             |       |         |   |
|-------|---------|-------|------------|---------------------------|-------|--------------|--------------|-------------|-------|---------|---|
| 42.68 | 1789.55 | 0.10  | -          | Unknown 42.6886           | 97.85 | 9210521.72   | 20910866.93  | 4250821.59  | 20.33 | 1.8997  | 1 |
| 42.88 | 1794.71 | -0.65 | 119-36-8   | Methyl Salicylate         | 88.49 | 669786.21    | 932393.10    | 30375.33    | 3.26  | 0.0847  | 1 |
| 43.35 | 1807.35 | -0.51 | 101-97-3   | Ethyl phenylacetate       | 97.40 | 2241946.39   | 3194437.22   | 145990.75   | 4.57  | 0.2902  | 1 |
| 43.76 | 1818.83 | -0.40 | -          | Unknown 44.0789           | 70.29 | 559929.51    | 5166464.97   | 312417.85   | 6.05  | 0.4694  | 1 |
| 44.48 | 1839.35 | -0.67 | 103-45-7   | Phenethyl acetate         | 99.24 | 13727297.93  | 19136937.94  | 599374.11   | 3.13  | 1.7385  | 1 |
| 44.72 | 1846.18 | -0.62 | 23726-93-4 | β-Damascenone             | 95.22 | 2509843.92   | 3736854.57   | 183153.42   | 4.90  | 0.3395  | 1 |
| 45.32 | 1863.47 | -0.62 | 106-33-2   | Ethyl dodecanoate         | 99.59 | 19477196.39  | 33662540.00  | 2396767.09  | 7.12  | 3.0581  | 1 |
| 45.62 | 1871.93 | 0.18  | 142-62-1   | Hexanoic acid             | 98.37 | 29416030.48  | 47472921.33  | 1542840.11  | 3.25  | 4.3128  | 1 |
| 46.00 | 1882.71 | 0.20  | 2306-91-4  | Isoamyl decanoate         | 94.33 | 2468695.08   | 2192428.21   | 186893.66   | 8.52  | 0.1992  | 1 |
| 46.67 | 1901.78 | 0.41  | 100-51-6   | Benzyl alcohol            | 99.62 | 17715301.28  | 18232514.84  | 966158.77   | 5.30  | 1.6564  | 1 |
| 47.02 | 1911.79 | 0.08  | -          | Unknown 47.0219           | 80.05 | 692648.87    | 892203.28    | 76701.60    | 8.60  | 0.0811  | 1 |
| 47.64 | 1930.09 | ND    | 28024-16-0 | Ethyl isopentyl succinate | 98.10 | 34103106.14  | 51661101.74  | 2106330.70  | 4.08  | 4.6933  | 3 |
| 48.92 | 1967.55 | -0.49 | -          | Unknown 48.8990           | 98.07 | 2155690.47   | 2782961.23   | 102370.40   | 3.68  | 0.2528  | 1 |
| 49.70 | 1990.60 | 0.50  | 112-53-8   | 1-Dodecanol               | 98.87 | 1998429.52   | 2166370.42   | 314933.04   | 14.54 | 0.1968  | 1 |
| 51.75 | 2063.28 | ND    | 2785-89-9  | 4-Ethylguaiaicol          | 85.28 | 233959.13    | 377778.62    | 23751.78    | 6.29  | 0.0343  | 3 |
| 51.99 | 2072.48 | -0.35 | -          | Unknown 51.9854           | 86.76 | 602160.62    | 910808.57    | 80437.26    | 8.83  | 0.0827  | 1 |
| 52.17 | 2079.16 | ND    | 124-06-1   | Ethyl tetradecanoate      | 75.65 | 229063.00    | 783095.85    | 84269.98    | 10.76 | 0.0711  | 3 |
| 52.53 | 2092.74 | 0.42  | 124-07-2   | Octanoic acid             | 99.30 | 134073301.73 | 111872820.53 | 14154425.41 | 12.65 | 10.1633 | 1 |
| 53.23 | 2124.61 | ND    | 128-37-0   | Butylated Hydroxytoluene  | 70.71 | 553769.07    | 775200.05    | 103260.37   | 13.32 | 0.0704  | 3 |
| 54.50 | 2197.98 | -0.57 | 123-07-9   | 4-Ethylphenol             | 96.38 | 6228561.18   | 9184470.82   | 252967.57   | 2.75  | 0.8344  | 1 |
| 55.83 | 2273.47 | 0.06  | 628-97-7   | Ethyl hexadecanoate       | 95.13 | 2216880.16   | 2154547.35   | 307475.32   | 14.27 | 0.1957  | 1 |
| 56.29 | 2299.69 | 1.08  | 334-48-5   | Decanoic acid             | 96.91 | 9970396.21   | 6334453.35   | 880603.38   | 13.90 | 0.5755  | 1 |
| 56.55 | 2313.62 | -0.35 | -          | Unknown 56.5471           | 89.91 | 684971.89    | 953279.07    | 54680.84    | 5.74  | 0.0866  | 1 |
| 56.76 | 2323.67 | -0.11 | 96-76-4    | 2,4-Di-tert-butylphenol   | 97.02 | 2400361.89   | 2526980.47   | 219728.25   | 8.70  | 0.2296  | 1 |
| 58.89 | 2426.47 | ND    | 1070-34-4  | Monoethyl succinate       | 81.85 | 6568825.59   | 9519758.90   | 1324171.21  | 13.91 | 0.8648  | 3 |

<sup>1</sup>Reproducibility, n=15; <sup>2</sup>Relative abundance of identified peaks; <sup>3</sup>1= VINOST2.mslibrary.xml, 2=Flavors-14.mslibrary.xml, 3=NIST 17; ND=Not determined

**Supplementary Table S3. Mass to charge ratio of unknown components**

| #  | RT     | RI   | Compound        | m/z                                               | Formula*      |
|----|--------|------|-----------------|---------------------------------------------------|---------------|
| 8  | 13.228 | 1093 | Unknown 13.2265 | 103.0749, 71.0853, 75.0440, 69.0698, 47.0129      | C9H20O2       |
| 12 | 16.578 | 1170 | Unknown 16.5912 | 105.0699, 121.1009, 93.0700, 136.1246, 91.0543    | C10H16        |
| 21 | 23.918 | 1328 | Unknown 23.8754 | 71.0490, 99.0802, 69.0697, 41.0387, 93.0696       | C10H18O       |
| 34 | 29.288 | 1453 | Unknown 29.3449 | 101.05960, 70.0414, 57.0701, 127.1114, 60.0208    | C10H20O2      |
| 37 | 30.610 | 1482 | Unknown 30.6066 | 96.02010, 95.0125, 67.0178, 96.0382, 96.0527      | C5H4O2        |
| 48 | 34.762 | 1583 | Unknown 34.7591 | 56.06220, 69.0699, 55.0545, 70.0776, 41.0389      | C8H18O        |
| 49 | 34.943 | 1588 | Unknown 34.9582 | 74.01820, 148.0543, 61.0105, 151.0234, 75.0255    | -             |
| 50 | 35.289 | 1596 | Unknown 35.2873 | 45.03370, 43.0544, 70.0777, 71.0851, 55.0543      | C8H16O3       |
| 51 | 35.898 | 1611 | Unknown 35.8931 | 45.03380, 57.0337, 43.0181, 47.0494, 45.0978      | C6H12O2       |
| 53 | 37.045 | 1642 | Unknown 37.0675 | 57.03360, 43.0543, 41.0387, 55.0543, 67.0541      | C12H24O       |
| 58 | 38.994 | 1691 | Unknown 38.9824 | 43.05430, 71.0852, 57.0699, 70.0774, 55.0543      | C15H32        |
| 59 | 39.200 | 1696 | Unknown 39.1966 | 60.02070, 74.0362, 41.0388, 57.0699, 87.0438      | C5H10O2       |
| 63 | 40.765 | 1738 | Unknown 40.7705 | 192.15010, 177.1266, 149.0957, 131.085, 105.0695  | C12H16O2      |
| 66 | 41.339 | 1754 | Unknown 41.3476 | 163.11170, 145.1009, 164.1163, 73.0647, 121.1011  | C11H12O3      |
| 67 | 41.533 | 1758 | Unknown 41.5185 | 157.10080, 142.077, 172.1242, 141.0695, 158.1041  | C13H16        |
| 71 | 42.691 | 1790 | Unknown 42.6886 | 133.01350, 151.024, 134.0139, 134.9926, 152.0244  | C8H9NO2       |
| 74 | 43.744 | 1818 | Unknown 43.7419 | 101.02320, 129.0543, 57.0699, 73.0283, 56.0619    | C8H14O4       |
| 75 | 44.084 | 1828 | Unknown 44.0789 | 190.1340, 107.0848, 105.0692, 175.1107, 91.0538   | C14H22        |
| 82 | 47.025 | 1912 | Unknown 47.0219 | 71.04890, 43.0542, 83.0853, 56.0619, 69.0697      | C16H30O4      |
| 85 | 48.905 | 1967 | Unknown 48.8990 | 174.99940, 147.9884, 195.0056, 176.9963, 149.9854 | C7H5ClF3N     |
| 89 | 51.992 | 2072 | Unknown 51.9854 | 85.0280, 69.0696, 41.0386, 93.0691, 71.0488       | C15H26O3      |
| 91 | 52.316 | 2084 | Unknown 52.3099 | 71.08530, 87.0437, 88.0515, 102.0671, 57.0697     | C10H20O2      |
| 93 | 54.425 | 2194 | Unknown 54.4273 | 149.04410, 105.0692, 104.0615, 133.0128, 150.0449 | C8H7NO2       |
| 96 | 56.080 | 2288 | Unknown 56.0757 | 181.09980, 165.0682, 166.0757, 210.1386, 167.0832 | C16H18        |
| 98 | 56.550 | 2313 | Unknown 56.5471 | 91.0541, 176.0832, 103.0541, 121.0646, 92.0613    | C13H14ClF2NO3 |

RT: Retention Time; RI: Retention Index; m/z: mass to charge ratio; \*Proposed formula

**Supplementary Table S4.** Batch sequence

| Line | Type     | Rack/Vials                | DataFile           | Sample Name     |
|------|----------|---------------------------|--------------------|-----------------|
| 1)   | MassCal: | 'MSTOFMASSCAL(PAUSEFAIL)' |                    |                 |
| 2)   | Sample   | 6/1                       | BcoST_03           | BcoST           |
| 3)   | Sample   | 6/2                       | FortST_03          | FortST          |
| 4)   | Sample   | 6/3                       | LaChanga_2017_02   | LaChanga_2017   |
| 5)   | MassCal: | 'MSTOFMASSCAL(PAUSEFAIL)' |                    |                 |
| 6)   | Sample   | 6/4                       | LosDolores_2018_01 | LosDolores_2018 |
| 7)   | Sample   | 6/5                       | BcoST_02           | BcoST           |
| 8)   | Sample   | 6/6                       | LaChanga_2018_03   | LaChanga_2018   |
| 9)   | MassCal: | 'MSTOFMASSCAL(PAUSEFAIL)' |                    |                 |
| 10)  | Sample   | 6/7                       | LosDolores_2018_02 | LosDolores_2018 |
| 11)  | Sample   | 6/8                       | FortST_01          | FortST          |
| 12)  | Sample   | 6/9                       | LaChanga_2017_03   | LaChanga_2017   |
| 13)  | MassCal: | 'MSTOFMASSCAL(PAUSEFAIL)' |                    |                 |
| 14)  | Sample   | 6/10                      | LaChanga_2017_01   | LaChanga_2017   |
| 15)  | Sample   | 6/11                      | LosDolores_2017_02 | LosDolores_2017 |
| 16)  | Sample   | 6/12                      | LosDolores_2017_03 | LosDolores_2017 |
| 17)  | MassCal: | 'MSTOFMASSCAL(PAUSEFAIL)' |                    |                 |
| 18)  | Sample   | 6/13                      | LosDolores_2017_01 | LosDolores_2017 |
| 19)  | Sample   | 6/14                      | LosDolores_2018_03 | LosDolores_2018 |
| 20)  | Sample   | 6/15                      | LaChanga_2018_01   | LaChanga_2018   |
| 21)  | MassCal: | 'MSTOFMASSCAL(PAUSEFAIL)' |                    |                 |
| 22)  | Sample   | 9/1                       | FortST_02          | FortST          |
| 23)  | Sample   | 9/2                       | LaChanga_2018_02   | LaChanga_2018   |
| 24)  | Sample   | 9/3                       | BcoST_01           | BcoST           |

BcoST= Pool, FortST= Pool spiked, MassCal= keyword to perform mass calibration and stop sequence if it failed.
